# Supplementary material for: Air pollution walk as an impact education tool for air quality sensitization: a pilot from an Indian megacity
Source: Copernicus journal article supplement (doi:10.5194/gc-7-151-2024), 2024-07-17
Supplement: Supplementary file 1 [file gc-7-151-2024-supplement.pdf]

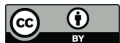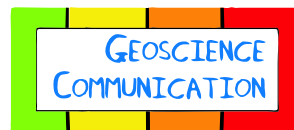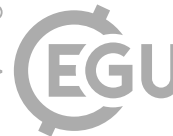

*Supplement of*

## **Air pollution walk as an impact education tool for air quality sensitization: a pilot from an Indian megacity**

**Debabrata Bej et al.**

*Correspondence to:* Arindam Roy (arindam.roy@epfl.ch)

The copyright of individual parts of the supplement might differ from the article licence.

## Supplementary information

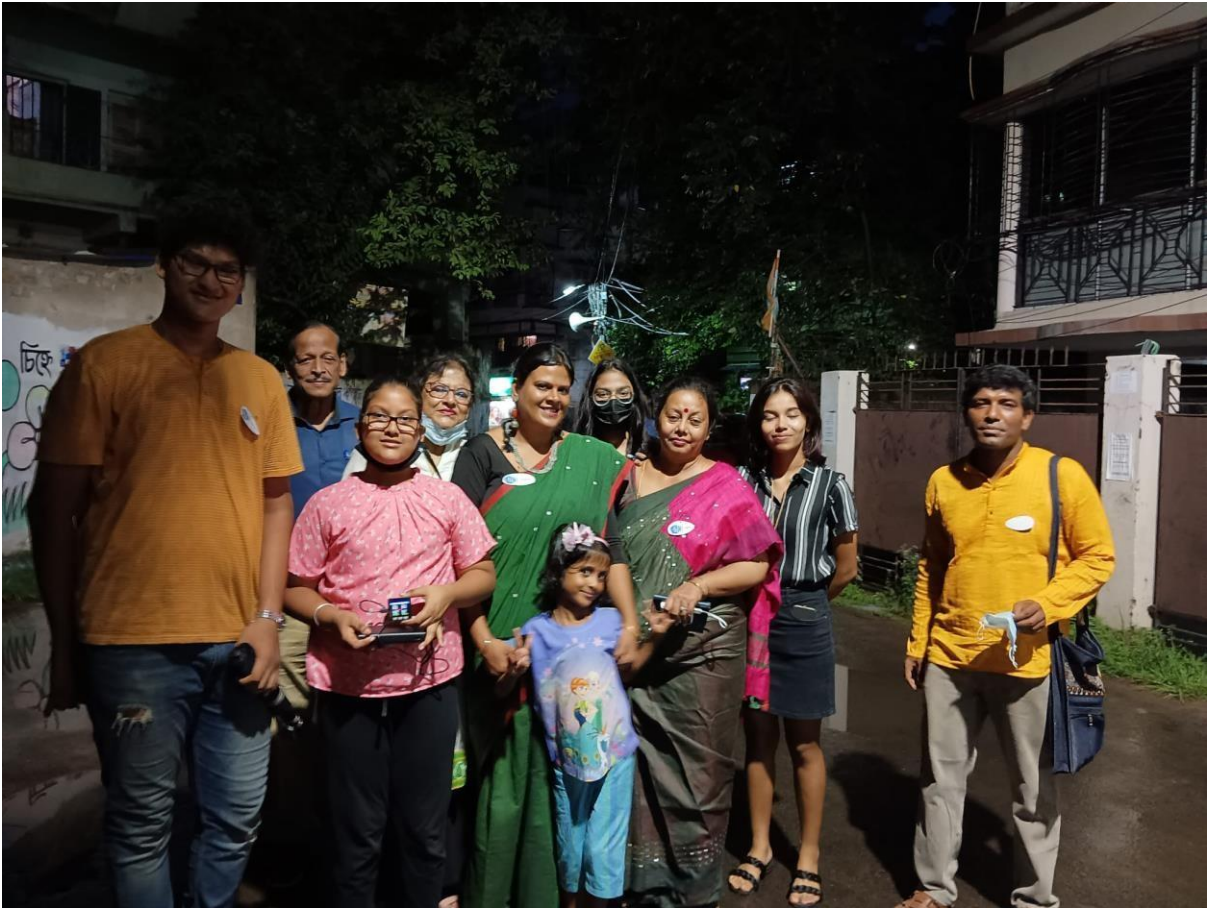

Fig S1: Picture of pollution walk conducted during this study

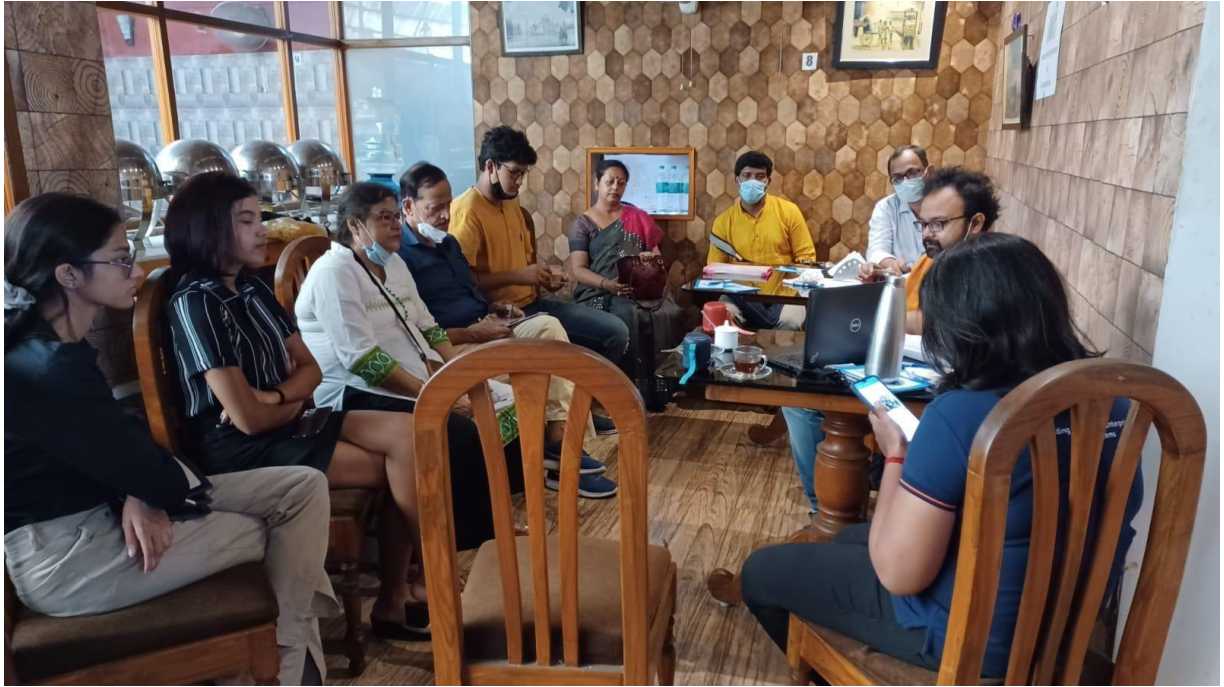

Fig S2: Focus group discussion after the pollution walk
